# Supplementary material
Source: publisher site journal article supplement (https://kjim.org/upload/media/kjim-2023-311-Supplementary-Fig-4.pdf)
Supplement: Supplementary file 1 [file kjim-2023-311-Supplementary-Fig-4.pdf]

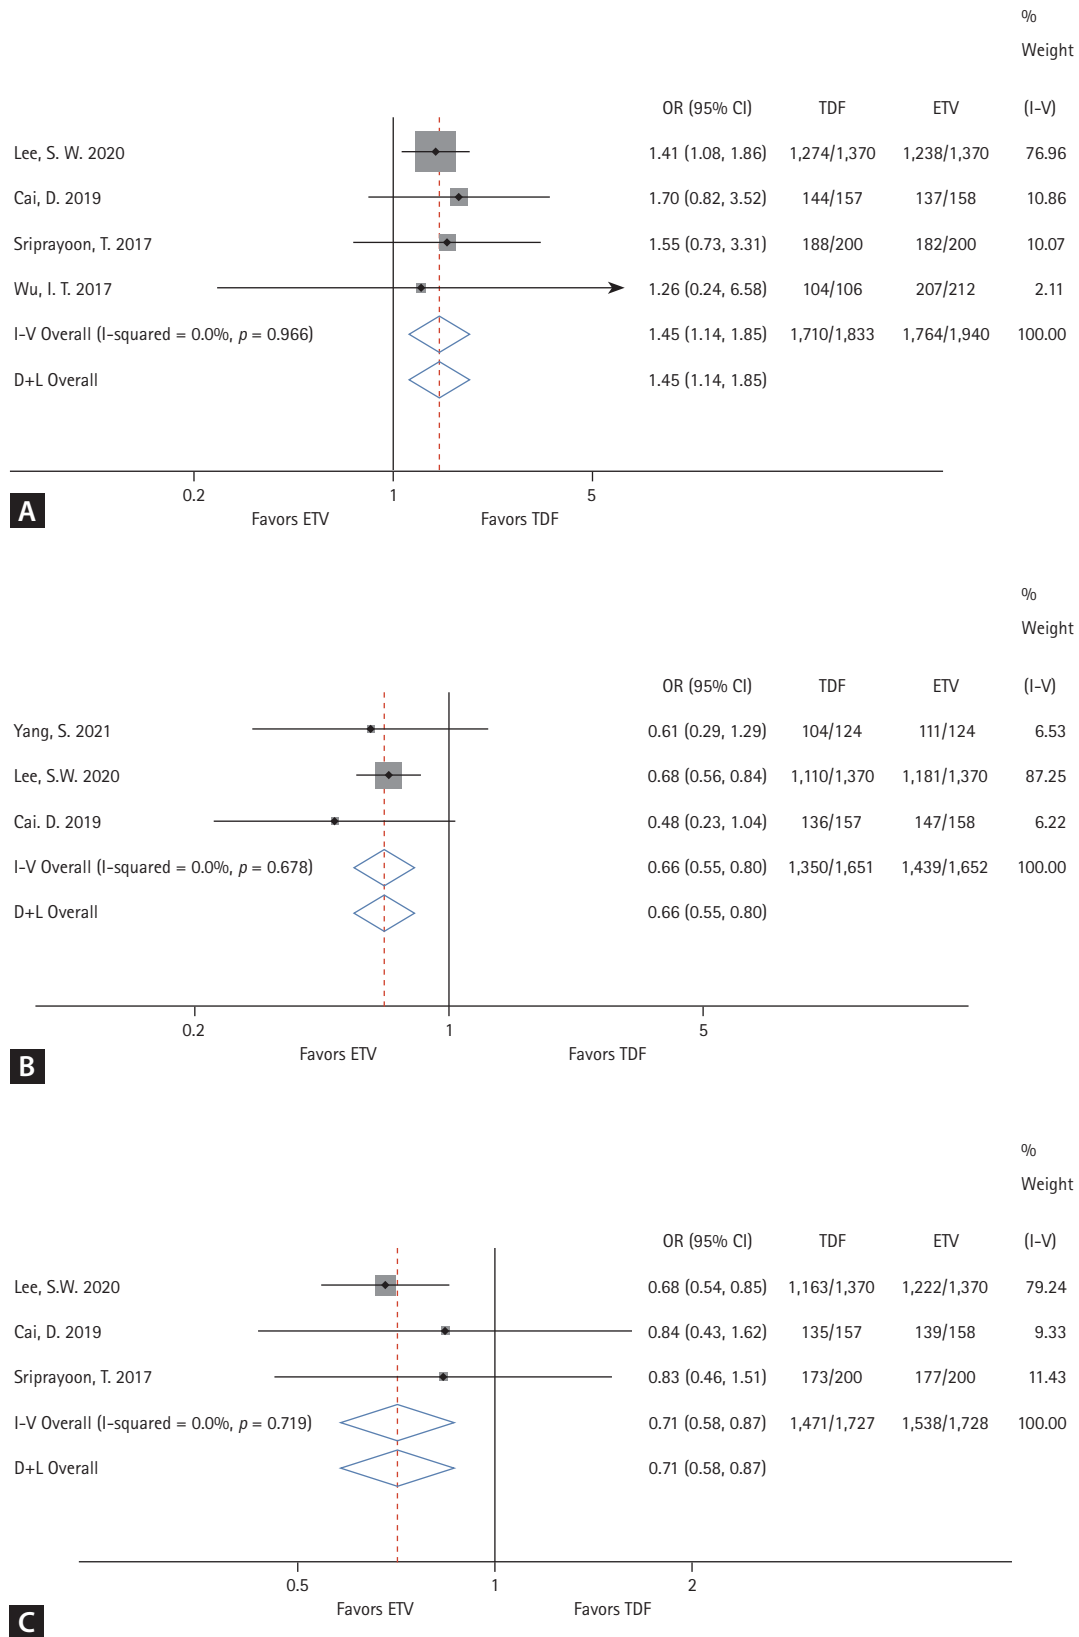

**Supplementary Figure 4.** Forest plot showing meta-analysis of ETV and TDF. (A) 144-week virologic response. (B) 96-week biochemical response. (C) 144-week biochemical response. OR, odds ratio; CI, confidence interval; TDF, tenofovir disoproxil fumarate; ETV, entecavir.
